# Supplementary material for: Modeling Clinical Trial Attrition Using Machine Intelligence: A driver analytics case study using 1,325 trials representing one million patients
Source: bioRxiv or medRxiv preprint supplement (doi:10.1101/2021.11.12.21266277), 2021-11-14
Supplement: Supplementary file [file media-1.pdf]

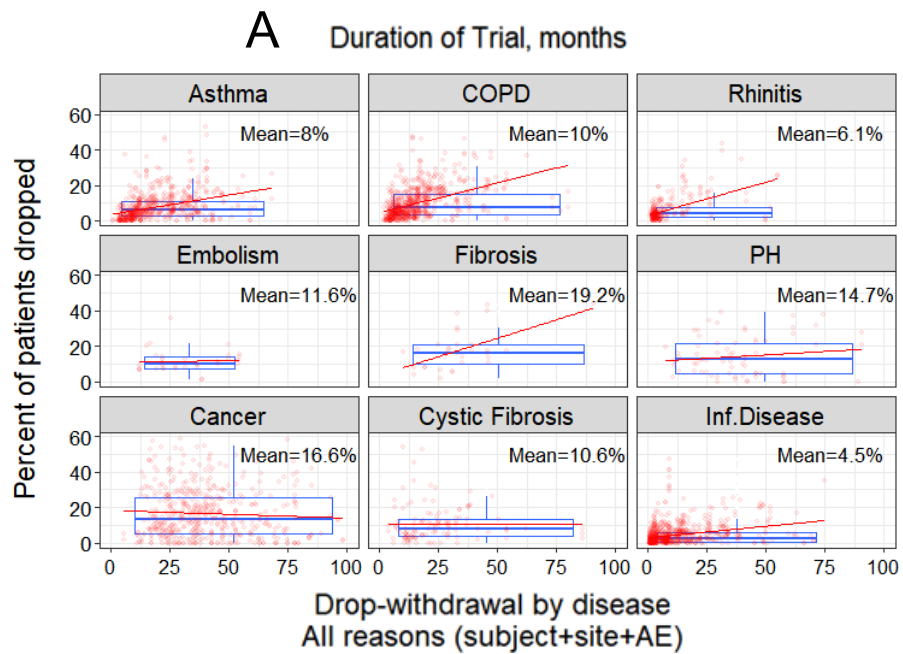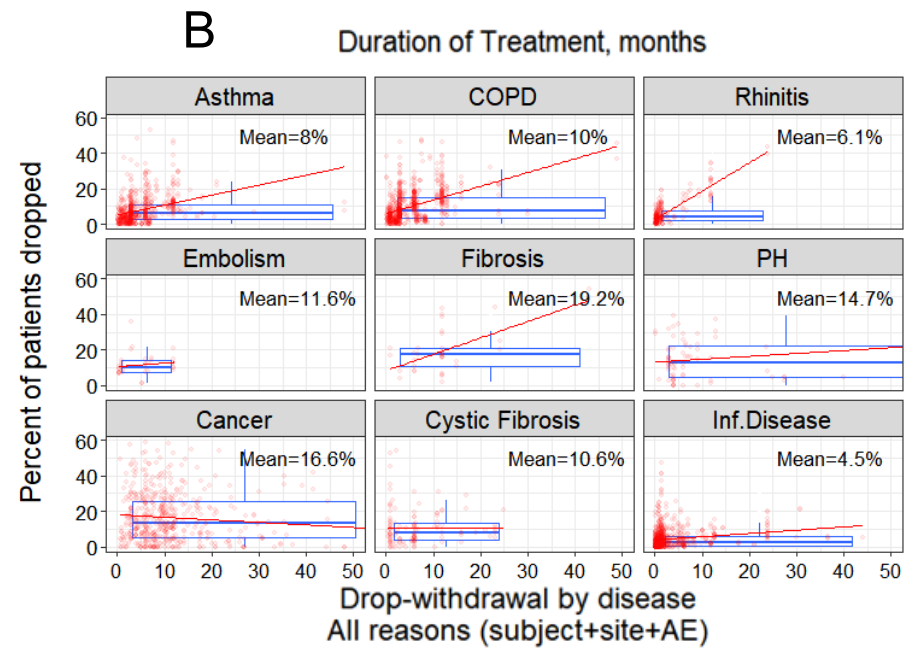

Supplemental Figure 1

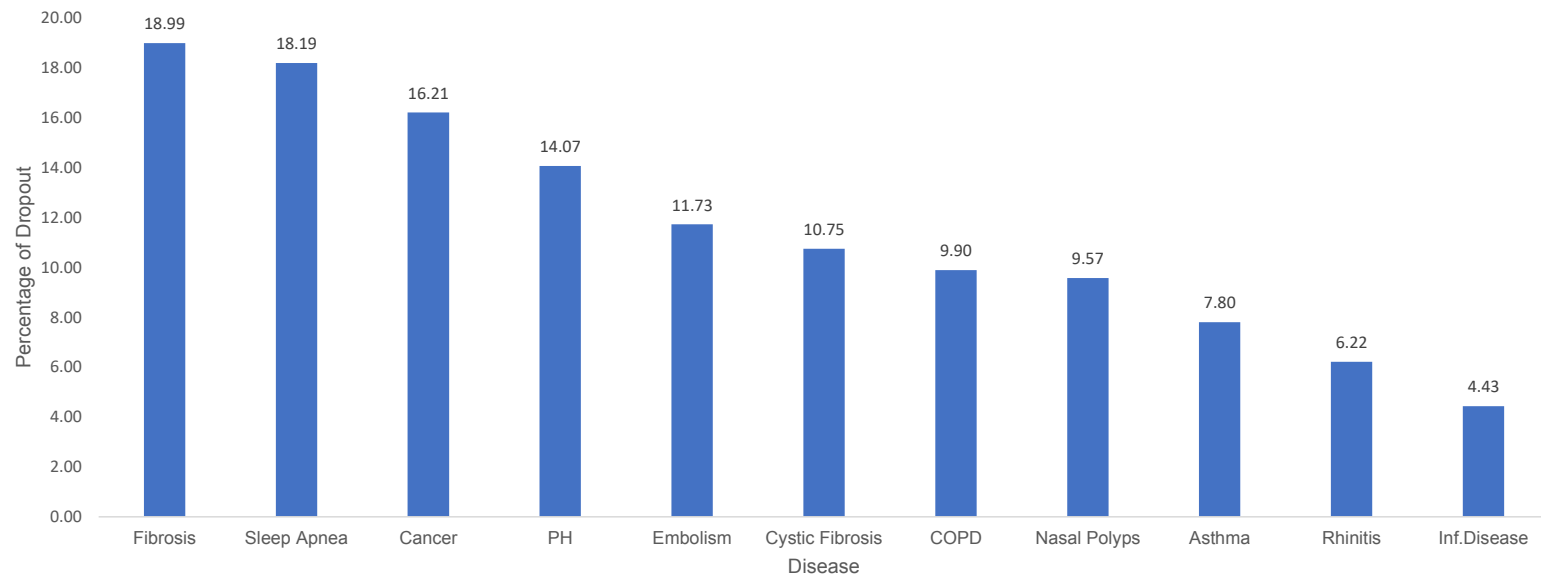

Supplemental Figure 2

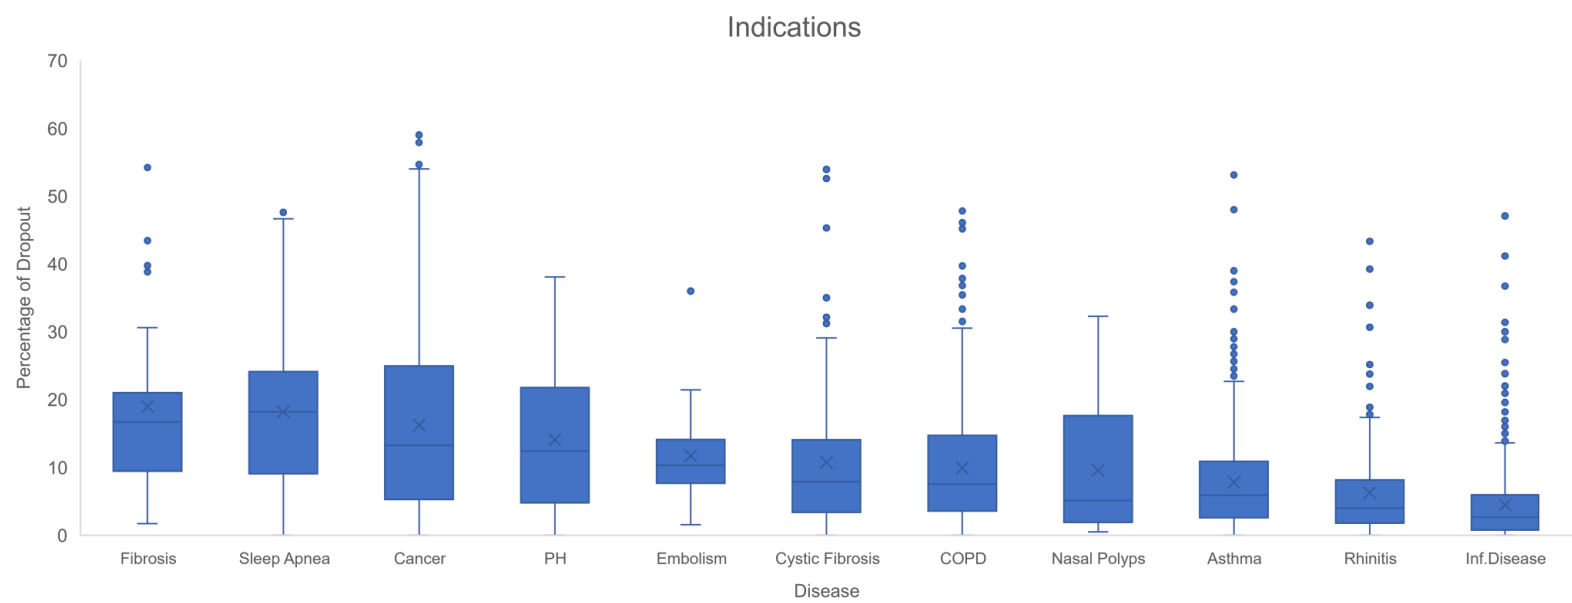

Supplemental Figure 3

| Variable Name          | Importance | Variable Name     | Importance | Variable Name      | Importance | Variable Name       | Importance |
|------------------------|------------|-------------------|------------|--------------------|------------|---------------------|------------|
| Duration.Trial         | 3.71400    | AE_URTI           | 0.70441    | AE_chest_pain      | 0.38369    | AE_drowsiness       | 0.20765    |
| Duration.Treatment     | 2.42106    | AE_diarrhoea      | 0.69946    | Age_mean           | 0.38151    | Tier2_fraction      | 0.20272    |
| AE_total_serious       | 1.61331    | AE_hypertension   | 0.66051    | AE_chills          | 0.37708    | AE_swelling         | 0.19447    |
| Disease_n              | 1.57841    | AE_abdominal_pain | 0.64610    | AE_syncope         | 0.37430    | AE_stroke           | 0.16498    |
| AE_respiratory_failure | 1.54807    | AE_bleeding       | 0.63590    | AE_insomnia        | 0.36911    | AE_hypotension      | 0.14925    |
| AE_nausea              | 1.49477    | AE_neutropenia    | 0.61036    | AE_heart_attack    | 0.35395    | AE_thrombocytopenia | 0.14853    |
| AE_back_pain           | 1.34323    | AE_AST_ALT        | 0.59867    | AE_asthma          | 0.34533    | AE_embolism         | 0.14507    |
| AE_nasopharyngitis     | 1.32966    | AE_constipation   | 0.58980    | Phase_n            | 0.30753    | AE_skin             | 0.14350    |
| AE_dyspnoea            | 1.27339    | AE_hyponatraemia  | 0.55089    | AE_pneumothorax    | 0.30710    | AE_nasal            | 0.12929    |
| GDP_weighted           | 1.08668    | Native_fraction   | 0.50362    | AE_heart_failure   | 0.30395    | AE_alopecia         | 0.12598    |
| AE_COPD                | 1.00711    | AE_pain           | 0.50243    | AE_GORD            | 0.30071    | AE_thrombosis       | 0.10139    |
| AE_UTI                 | 0.99751    | AE_dehydration    | 0.49400    | AE_LRTI            | 0.29124    | AE_hyperglycaemia   | 0.09024    |
| AE_cough               | 0.98649    | AE_muscle_pain    | 0.49087    | AE_mood            | 0.28042    | Industry_n          | 0.08609    |
| Female_fraction        | 0.92635    | AE_injection_site | 0.41509    | AE_joint_pain      | 0.27656    | AE_fibrillation     | 0.08405    |
| AE_total_other         | 0.92028    | Tier3_fraction    | 0.41373    | AE_dyspepsia       | 0.27238    | AE_pleural_effusion | 0.07435    |
| AE_fatigue             | 0.84326    | AE_anorexia       | 0.41210    | AE_renal_failure   | 0.22347    | AE_hypoxia          | 0.05447    |
| AA_fraction            | 0.80997    | AE_limb_pain      | 0.40129    | AE_gastroenteritis | 0.21740    | AE_total_mortality  | 0.04156    |
| AE_hypokalaemia        | 0.79294    | AE_headache       | 0.39666    | AE_haemoptysis     | 0.21384    | AE_taste            | 0.02010    |
| AE_dizziness           | 0.78284    | AE_sepsis         | 0.39120    | Asian_fraction     | 0.21010    | AE_pharynx_pain     | 0.00119    |
| N_total                | 0.74820    | AE_pyrexia        | 0.38522    | AE_anaemia         | 0.20896    |                     |            |

Supplemental Table 1
